# Supplementary material
Source: publisher figshare collection journal article supplement (https://brill.figshare.com/articles/dataset/_/20058974)
Supplement: Supplementary file 1 [file 1]

## Sheet: Sheet1
2004	Baboon	Bridge	59	E-W
2004	Baboon	Bridge	59	E-W
2004	Baboon	Bridge	38	W-E
2004	Colobus	Bridge	38	E-W
2004	Colobus	Bridge	38	E-W
2004	Colobus	Bridge	38	E-W
2004	Colobus	Bridge	35	E-W
2004	Colobus	Bridge	41	W-E
2004	Colobus	Bridge	41	W-E
2004	Colobus	Bridge	41	W-E
2004	Colobus	Bridge	41	W-E
2004	Colobus	Bridge	40	W-E
2004	Colobus	Bridge	56	W-E
2004	Colobus	Bridge	56	W-E
2004	Colobus	Bridge	56	W-E
2004	Colobus	Bridge	56	W-E
2004	Colobus	Bridge	37	E-W
2004	Colobus	Bridge	37	E-W
2004	Colobus	Bridge	37	E-W
2004	Colobus	Bridge	37	E-W
2004	Colobus	Bridge	37	E-W
2004	Colobus	Bridge	37	E-W
2004	Colobus	Bridge	37	E-W
2004	Colobus	Bridge	37	E-W
2004	Colobus	Bridge	70	W-E
2004	Colobus	Bridge	70	W-E
2004	Colobus	Bridge	70	W-E
2004	Colobus	Bridge	70	W-E
2004	Colobus	Bridge	70	W-E
2011	Colobus	Bridge	22	W-E
2011	Colobus	Bridge	22	E-W
2011	Colobus	Bridge	19	E-W
2011	Colobus	Bridge	19	E-W
2011	Colobus	Bridge	25	W-E
2011	Colobus	Bridge	25	W-E
2011	Colobus	Bridge	25	W-E
2011	Colobus	Bridge	25	W-E
2011	Colobus	Bridge	21	W-E
2011	Colobus	Bridge	21	W-E
2011	Colobus	Bridge	20	W-E
2011	Colobus	Bridge	64	E-W
2011	Colobus	Bridge	64	E-W
2011	Colobus	Bridge	64	E-W
2011	Colobus	Bridge	64	E-W
2011	Colobus	Bridge	44	W-E
2011	Colobus	Bridge	57	W-E
2011	Colobus	Bridge	57	W-E
2011	Colobus	Bridge	57	W-E
2011	Colobus	Bridge	57	W-E
2011	Colobus	Bridge	57	W-E
2011	Colobus	Bridge	57	W-E
2011	Colobus	Bridge	57	W-E
2011	Colobus	Bridge	50	E-W
2011	Colobus	Bridge	40	E-W
2011	Colobus	Bridge	49	E-W
2011	Colobus	Bridge	49	E-W
2011	Colobus	Bridge	49	E-W
2011	Colobus	Bridge	49	E-W
2011	Colobus	Bridge	49	E-W
2011	Colobus	Bridge	49	E-W
2011	Colobus	Bridge	49	E-W
2011	Colobus	Bridge	66	W-E
2011	Colobus	Bridge	66	W-E
2011	Colobus	Bridge	66	W-E
2011	Colobus	Bridge	57	W-E
2011	Colobus	Bridge	57	W-E
2011	Colobus	Bridge	91	W-E
2011	Colobus	Bridge	91	W-E
2011	Colobus	Bridge	91	W-E
2011	Colobus	Bridge	91	W-E
2011	Colobus	Bridge	51	W-E
2011	Colobus	Bridge	51	W-E
2011	Colobus	Bridge	59	W-E
2011	Colobus	Bridge	59	W-E
2011	Colobus	Bridge	59	W-E
2011	Colobus	Bridge	35	W-E
2011	Colobus	Bridge	35	W-E
2011	Colobus	Bridge	35	W-E
2011	Colobus	Bridge	35	W-E
2011	Colobus	Bridge	77	E-W
2011	Colobus	Bridge	78	E-W
2011	Colobus	Bridge	78	E-W
2011	Colobus	Bridge	71	E-W
2011	Colobus	Bridge	71	E-W
2011	Colobus	Bridge	71	E-W
2011	Colobus	Bridge	71	E-W
2011	Colobus	Bridge	71	E-W
2011	Colobus	Bridge	71	E-W
2011	Colobus	Bridge	71	E-W
2011	Colobus	Bridge	79	W-E
2011	Colobus	Bridge	79	W-E
2011	Colobus	Bridge	79	W-E
2011	Colobus	Bridge	58	W-E
2011	Colobus	Bridge	58	W-E
2020	Colobus	Bridge	15	E-W
2020	Colobus	Bridge	41	W-E
2020	Colobus	Bridge	41	W-E
2020	Colobus	Bridge	41	W-E
2020	Colobus	Bridge	41	W-E
2020	Colobus	Bridge	41	W-E
2020	Colobus	Bridge	38	E-W
2020	Colobus	Bridge	41	E-W
2020	Colobus	Bridge	41	E-W
2020	Colobus	Bridge	101	E-W
2020	Colobus	Bridge	98	W-E
2020	Colobus	Bridge	114	W-E
2020	Colobus	Bridge	114	W-E
2020	Colobus	Bridge	77	E-W
2020	Colobus	Bridge	77	E-W
2020	Colobus	Bridge	77	E-W
2020	Colobus	Bridge	77	E-W
2020	Colobus	Bridge	77	E-W
2020	Colobus	Bridge	77	E-W
2020	Colobus	Bridge	77	E-W
2020	Colobus	Bridge	31	W-E
2020	Colobus	Bridge	31	W-E
2020	Colobus	Bridge	47	E-W
2020	Colobus	Bridge	49	W-E
2020	Colobus	Bridge	55	W-E
2020	Colobus	Bridge	55	E-W
2020	Colobus	Bridge	55	E-W
2020	Colobus	Bridge	50	E-W
2020	Colobus	Bridge	60	W-E
2020	Colobus	Bridge	60	E-W
2020	Colobus	Bridge	60	E-W
2020	Colobus	Bridge	60	E-W
2020	Colobus	Bridge	60	E-W
2020	Colobus	Bridge	60	E-W
2020	Colobus	Bridge	65	W-E
2020	Colobus	Bridge	65	W-E
2020	Colobus	Bridge	65	E-W
2020	Colobus	Bridge	65	E-W
2020	Colobus	Bridge	45	W-E
2020	Colobus	Bridge	45	E-W
2020	Colobus	Bridge	45	E-W
2020	Colobus	Bridge	60	E-W
2020	Colobus	Bridge	60	E-W
2020	Colobus	Bridge	68	W-E
2020	Colobus	Bridge	50	E-W
2020	Colobus	Bridge	51	E-W
2020	Colobus	Bridge	50	W-E
2020	Colobus	Bridge	50	W-E
2020	Colobus	Bridge	50	W-E
2020	Colobus	Bridge	170	W-E
2020	Colobus	Bridge	170	W-E
2020	Colobus	Bridge	170	W-E
2020	Colobus	Bridge	170	W-E
2020	Colobus	Bridge	85	W-E
2020	Colobus	Bridge	85	W-E
2020	Colobus	Bridge	85	W-E
2020	Colobus	Bridge	85	W-E
2020	Colobus	Bridge	85	W-E
2020	Colobus	Bridge	85	W-E
2020	Colobus	Bridge	85	W-E
2020	Colobus	Bridge	97	E-W
2020	Colobus	Bridge	97	E-W
2020	Colobus	Bridge	97	E-W
2020	Colobus	Bridge	93	E-W
2020	Colobus	Bridge	93	E-W
2020	Colobus	Bridge	93	E-W
2020	Colobus	Bridge	93	E-W
2020	Colobus	Bridge	93	E-W
2004	Sykes's	Bridge	9	E-W
2004	Sykes's	Bridge	9	E-W
2004	Sykes's	Bridge	9	E-W
2004	Sykes's	Bridge	17	E-W
2004	Sykes's	Bridge	16	W-E
2004	Sykes's	Bridge	16	W-E
2004	Sykes's	Bridge	15	E-W
2004	Sykes's	Bridge	15	E-W
2004	Sykes's	Bridge	15	E-W
2004	Sykes's	Bridge	15	E-W
2004	Sykes's	Bridge	15	E-W
2004	Sykes's	Bridge	15	E-W
2004	Sykes's	Bridge	15	E-W
2004	Sykes's	Bridge	15	E-W
2004	Sykes's	Bridge	15	E-W
2004	Sykes's	Bridge	15	E-W
2004	Sykes's	Bridge	15	E-W
2004	Sykes's	Bridge	15	E-W
2004	Sykes's	Bridge	15	E-W
2004	Sykes's	Bridge	38	E-W
2004	Sykes's	Bridge	38	E-W
2004	Sykes's	Bridge	38	E-W
2004	Sykes's	Bridge	38	E-W
2004	Sykes's	Bridge	38	E-W
2004	Sykes's	Bridge	38	E-W
2004	Sykes's	Bridge	38	E-W
2004	Sykes's	Bridge	38	E-W
2004	Sykes's	Bridge	38	E-W
2004	Sykes's	Bridge	14	E-W
2004	Sykes's	Bridge	11	W-E
2004	Sykes's	Bridge	11	W-E
2004	Sykes's	Bridge	10	W-E
2004	Sykes's	Bridge	18	E-W
2004	Sykes's	Bridge	18	E-W
2004	Sykes's	Bridge	16	E-W
2004	Sykes's	Bridge	16	E-W
2004	Sykes's	Bridge	20	E-W
2004	Sykes's	Bridge	20	E-W
2004	Sykes's	Bridge	20	E-W
2004	Sykes's	Bridge	20	E-W
2004	Sykes's	Bridge	20	E-W
2004	Sykes's	Bridge	20	E-W
2004	Sykes's	Bridge	20	E-W
2004	Sykes's	Bridge	20	E-W
2004	Sykes's	Bridge	20	E-W
2004	Sykes's	Bridge	20	E-W
2004	Sykes's	Bridge	20	E-W
2004	Sykes's	Bridge	20	E-W
2004	Sykes's	Bridge	20	E-W
2004	Sykes's	Bridge	20	E-W
2004	Sykes's	Bridge	20	E-W
2004	Sykes's	Bridge	20	E-W
2004	Sykes's	Bridge	20	E-W
2004	Sykes's	Bridge	20	E-W
2004	Sykes's	Bridge	20	E-W
2004	Sykes's	Bridge	20	E-W
2004	Sykes's	Bridge	18	E-W
2004	Sykes's	Bridge	17	E-W
2004	Sykes's	Bridge	20	E-W
2004	Sykes's	Bridge	20	E-W
2004	Sykes's	Bridge	20	E-W
2004	Sykes's	Bridge	20	E-W
2004	Sykes's	Bridge	20	E-W
2004	Sykes's	Bridge	20	E-W
2004	Sykes's	Bridge	20	E-W
2004	Sykes's	Bridge	33	E-W
2004	Sykes's	Bridge	33	E-W
2004	Sykes's	Bridge	33	E-W
2004	Sykes's	Bridge	33	E-W
2004	Sykes's	Bridge	33	E-W
2004	Sykes's	Bridge	33	E-W
2004	Sykes's	Bridge	33	E-W
2004	Sykes's	Bridge	33	E-W
2004	Sykes's	Bridge	33	E-W
2004	Sykes's	Bridge	33	E-W
2004	Sykes's	Bridge	33	E-W
2004	Sykes's	Bridge	21	E-W
2004	Sykes's	Bridge	21	E-W
2004	Sykes's	Bridge	17	W-E
2004	Sykes's	Bridge	17	W-E
2004	Sykes's	Bridge	17	W-E
2004	Sykes's	Bridge	17	W-E
2004	Sykes's	Bridge	30	W-E
2004	Sykes's	Bridge	30	W-E
2004	Sykes's	Bridge	30	W-E
2004	Sykes's	Bridge	30	W-E
2004	Sykes's	Bridge	30	W-E
2004	Sykes's	Bridge	30	W-E
2004	Sykes's	Bridge	30	W-E
2004	Sykes's	Bridge	30	E-W
2004	Sykes's	Bridge	30	E-W
2004	Sykes's	Bridge	25	W-E
2004	Sykes's	Bridge	25	E-W
2004	Sykes's	Bridge	21	W-E
2004	Sykes's	Bridge	21	W-E
2004	Sykes's	Bridge	38	E-W
2004	Sykes's	Bridge	15	E-W
2004	Sykes's	Bridge	15	E-W
2004	Sykes's	Bridge	20	W-E
2004	Sykes's	Bridge	33	W-E
2004	Sykes's	Bridge	25	W-E
2004	Sykes's	Bridge	25	E-W
2004	Sykes's	Bridge	25	E-W
2004	Sykes's	Bridge	25	E-W
2004	Sykes's	Bridge	21	W-E
2004	Sykes's	Bridge	21	W-E
2004	Sykes's	Bridge	35	W-E
2004	Sykes's	Bridge	14	W-E
2004	Sykes's	Bridge	14	W-E
2004	Sykes's	Bridge	22	E-W
2004	Sykes's	Bridge	34	E-W
2004	Sykes's	Bridge	34	E-W
2004	Sykes's	Bridge	35	E-W
2004	Sykes's	Bridge	35	W-E
2004	Sykes's	Bridge	35	W-E
2004	Sykes's	Bridge	20	E-W
2004	Sykes's	Bridge	20	E-W
2004	Sykes's	Bridge	31	W-E
2004	Sykes's	Bridge	31	E-W
2004	Sykes's	Bridge	35	W-E
2004	Sykes's	Bridge	30	E-W
2004	Sykes's	Bridge	30	E-W
2004	Sykes's	Bridge	30	E-W
2004	Sykes's	Bridge	30	E-W
2004	Sykes's	Bridge	40	W-E
2004	Sykes's	Bridge	36	E-W
2004	Sykes's	Bridge	20	E-W
2004	Sykes's	Bridge	20	E-W
2004	Sykes's	Bridge	20	E-W
2004	Sykes's	Bridge	28	W-E
2004	Sykes's	Bridge	28	W-E
2004	Sykes's	Bridge	28	W-E
2004	Sykes's	Bridge	28	W-E
2004	Sykes's	Bridge	21	E-W
2004	Sykes's	Bridge	42	E-W
2004	Sykes's	Bridge	42	E-W
2004	Sykes's	Bridge	42	E-W
2004	Sykes's	Bridge	42	E-W
2004	Sykes's	Bridge	42	E-W
2004	Sykes's	Bridge	35	W-E
2004	Sykes's	Bridge	35	W-E
2004	Sykes's	Bridge	70	W-E
2004	Sykes's	Bridge	70	W-E
2004	Sykes's	Bridge	35	W-E
2004	Sykes's	Bridge	35	W-E
2004	Sykes's	Bridge	35	W-E
2004	Sykes's	Bridge	35	W-E
2004	Sykes's	Bridge	40	W-E
2004	Sykes's	Bridge	30	E-W
2004	Sykes's	Bridge	30	E-W
2004	Sykes's	Bridge	28	W-E
2004	Sykes's	Bridge	28	W-E
2004	Sykes's	Bridge	28	W-E
2004	Sykes's	Bridge	28	E-W
2004	Sykes's	Bridge	28	E-W
2004	Sykes's	Bridge	28	E-W
2004	Sykes's	Bridge	28	E-W
2004	Sykes's	Bridge	44	E-W
2004	Sykes's	Bridge	32	W-E
2004	Sykes's	Bridge	30	E-W
2004	Sykes's	Bridge	30	E-W
2004	Sykes's	Bridge	29	W-E
2004	Sykes's	Bridge	29	E-W
2004	Sykes's	Bridge	29	E-W
2004	Sykes's	Bridge	45	W-E
2004	Sykes's	Bridge	45	E-W
2004	Sykes's	Bridge	51	W-E
2004	Sykes's	Bridge	51	W-E
2004	Sykes's	Bridge	51	W-E
2004	Sykes's	Bridge	69	W-E
2004	Sykes's	Bridge	60	W-E
2004	Sykes's	Bridge	25	E-W
2004	Sykes's	Bridge	25	E-W
2004	Sykes's	Bridge	31	W-E
2004	Sykes's	Bridge	55	W-E
2004	Sykes's	Bridge	55	W-E
2004	Sykes's	Bridge	48	E-W
2004	Sykes's	Bridge	48	E-W
2004	Sykes's	Bridge	48	E-W
2004	Sykes's	Bridge	45	E-W
2004	Sykes's	Bridge	45	W-E
2004	Sykes's	Bridge	35	W-E
2004	Sykes's	Bridge	26	W-E
2004	Sykes's	Bridge	26	E-W
2004	Sykes's	Bridge	35	E-W
2004	Sykes's	Bridge	35	E-W
2004	Sykes's	Bridge	35	E-W
2004	Sykes's	Bridge	35	E-W
2004	Sykes's	Bridge	35	E-W
2004	Sykes's	Bridge	35	E-W
2004	Sykes's	Bridge	35	E-W
2004	Sykes's	Bridge	35	E-W
2004	Sykes's	Bridge	35	E-W
2004	Sykes's	Bridge	35	W-E
2004	Sykes's	Bridge	35	W-E
2004	Sykes's	Bridge	35	W-E
2004	Sykes's	Bridge	27	W-E
2004	Sykes's	Bridge	27	E-W
2004	Sykes's	Bridge	25	W-E
2004	Sykes's	Bridge	48	E-W
2004	Sykes's	Bridge	26	E-W
2004	Sykes's	Bridge	45	W-E
2004	Sykes's	Bridge	45	W-E
2004	Sykes's	Bridge	45	W-E
2004	Sykes's	Bridge	45	W-E
2004	Sykes's	Bridge	30	E-W
2004	Sykes's	Bridge	30	E-W
2004	Sykes's	Bridge	30	W-E
2004	Sykes's	Bridge	61	W-E
2004	Sykes's	Bridge	61	E-W
2004	Sykes's	Bridge	61	E-W
2004	Sykes's	Bridge	61	E-W
2004	Sykes's	Bridge	37	W-E
2004	Sykes's	Bridge	37	W-E
2004	Sykes's	Bridge	37	W-E
2004	Sykes's	Bridge	37	W-E
2004	Sykes's	Bridge	37	E-W
2004	Sykes's	Bridge	37	E-W
2004	Sykes's	Bridge	35	W-E
2004	Sykes's	Bridge	35	W-E
2004	Sykes's	Bridge	35	W-E
2004	Sykes's	Bridge	21	E-W
2004	Sykes's	Bridge	21	E-W
2004	Sykes's	Bridge	39	W-E
2004	Sykes's	Bridge	39	W-E
2004	Sykes's	Bridge	39	W-E
2004	Sykes's	Bridge	39	W-E
2004	Sykes's	Bridge	39	W-E
2004	Sykes's	Bridge	39	W-E
2004	Sykes's	Bridge	39	W-E
2004	Sykes's	Bridge	40	W-E
2004	Sykes's	Bridge	40	E-W
2004	Sykes's	Bridge	31	E-W
2004	Sykes's	Bridge	19	W-E
2004	Sykes's	Bridge	41	E-W
2004	Sykes's	Bridge	41	E-W
2004	Sykes's	Bridge	41	E-W
2004	Sykes's	Bridge	41	E-W
2004	Sykes's	Bridge	44	E-W
2004	Sykes's	Bridge	57	W-E
2004	Sykes's	Bridge	34	W-E
2004	Sykes's	Bridge	47	E-W
2004	Sykes's	Bridge	47	E-W
2004	Sykes's	Bridge	47	E-W
2004	Sykes's	Bridge	47	E-W
2004	Sykes's	Bridge	40	W-E
2004	Sykes's	Bridge	30	W-E
2004	Sykes's	Bridge	30	W-E
2004	Sykes's	Bridge	30	W-E
2004	Sykes's	Bridge	30	W-E
2004	Sykes's	Bridge	43	W-E
2004	Sykes's	Bridge	43	W-E
2004	Sykes's	Bridge	43	W-E
2004	Sykes's	Bridge	43	W-E
2004	Sykes's	Bridge	43	W-E
2004	Sykes's	Bridge	43	W-E
2004	Sykes's	Bridge	43	E-W
2004	Sykes's	Bridge	43	E-W
2004	Sykes's	Bridge	43	E-W
2004	Sykes's	Bridge	43	E-W
2004	Sykes's	Bridge	43	E-W
2004	Sykes's	Bridge	33	W-E
2004	Sykes's	Bridge	33	W-E
2004	Sykes's	Bridge	42	W-E
2004	Sykes's	Bridge	42	E-W
2004	Sykes's	Bridge	42	E-W
2004	Sykes's	Bridge	55	E-W
2004	Sykes's	Bridge	55	E-W
2004	Sykes's	Bridge	55	E-W
2004	Sykes's	Bridge	55	W-E
2004	Sykes's	Bridge	59	E-W
2004	Sykes's	Bridge	59	E-W
2004	Sykes's	Bridge	59	E-W
2004	Sykes's	Bridge	38	E-W
2004	Sykes's	Bridge	36	W-E
2004	Sykes's	Bridge	33	W-E
2004	Sykes's	Bridge	30	W-E
2004	Sykes's	Bridge	30	W-E
2004	Sykes's	Bridge	33	W-E
2004	Sykes's	Bridge	31	W-E
2004	Sykes's	Bridge	31	W-E
2004	Sykes's	Bridge	32	W-E
2004	Sykes's	Bridge	32	W-E
2004	Sykes's	Bridge	32	W-E
2004	Sykes's	Bridge	32	W-E
2004	Sykes's	Bridge	32	W-E
2004	Sykes's	Bridge	32	W-E
2004	Sykes's	Bridge	46	W-E
2004	Sykes's	Bridge	55	W-E
2004	Sykes's	Bridge	42	W-E
2004	Sykes's	Bridge	45	W-E
2004	Sykes's	Bridge	45	W-E
2004	Sykes's	Bridge	57	W-E
2004	Sykes's	Bridge	57	W-E
2004	Sykes's	Bridge	57	W-E
2004	Sykes's	Bridge	57	W-E
2004	Sykes's	Bridge	57	W-E
2004	Sykes's	Bridge	57	W-E
2004	Sykes's	Bridge	57	W-E
2004	Sykes's	Bridge	34	W-E
2004	Sykes's	Bridge	34	W-E
2004	Sykes's	Bridge	34	W-E
2004	Sykes's	Bridge	34	W-E
2004	Sykes's	Bridge	34	W-E
2004	Sykes's	Bridge	34	W-E
2004	Sykes's	Bridge	35	W-E
2004	Sykes's	Bridge	35	W-E
2004	Sykes's	Bridge	35	W-E
2004	Sykes's	Bridge	35	W-E
2004	Sykes's	Bridge	35	W-E
2004	Sykes's	Bridge	35	W-E
2004	Sykes's	Bridge	70	W-E
2004	Sykes's	Bridge	70	W-E
2004	Sykes's	Bridge	70	W-E
2004	Sykes's	Bridge	70	W-E
2004	Sykes's	Bridge	23	E-W
2004	Sykes's	Bridge	23	E-W
2004	Sykes's	Bridge	32	W-E
2004	Sykes's	Bridge	18	E-W
2004	Sykes's	Bridge	28	E-W
2004	Sykes's	Bridge	43	W-E
2004	Sykes's	Bridge	61	W-E
2004	Sykes's	Bridge	61	W-E
2004	Sykes's	Bridge	27	E-W
2004	Sykes's	Bridge	31	W-E
2004	Sykes's	Bridge	31	E-W
2004	Sykes's	Bridge	53	E-W
2004	Sykes's	Bridge	53	E-W
2004	Sykes's	Bridge	53	E-W
2004	Sykes's	Bridge	53	E-W
2004	Sykes's	Bridge	53	E-W
2004	Sykes's	Bridge	55	W-E
2004	Sykes's	Bridge	55	W-E
2004	Sykes's	Bridge	55	W-E
2004	Sykes's	Bridge	55	W-E
2004	Sykes's	Bridge	55	W-E
2004	Sykes's	Bridge	55	W-E
2004	Sykes's	Bridge	55	W-E
2004	Sykes's	Bridge	61	W-E
2004	Sykes's	Bridge	45	W-E
2004	Sykes's	Bridge	27	W-E
2004	Sykes's	Bridge	27	E-W
2004	Sykes's	Bridge	27	E-W
2004	Sykes's	Bridge	29	W-E
2004	Sykes's	Bridge	29	W-E
2004	Sykes's	Bridge	29	E-W
2004	Sykes's	Bridge	29	E-W
2004	Sykes's	Bridge	47	E-W
2004	Sykes's	Bridge	47	E-W
2004	Sykes's	Bridge	47	E-W
2004	Sykes's	Bridge	35	W-E
2004	Sykes's	Bridge	27	W-E
2004	Sykes's	Bridge	31	W-E
2004	Sykes's	Bridge	28	W-E
2004	Sykes's	Bridge	28	E-W
2004	Sykes's	Bridge	31	E-W
2004	Sykes's	Bridge	47	E-W
2004	Sykes's	Bridge	45	W-E
2004	Sykes's	Bridge	40	E-W
2004	Sykes's	Bridge	40	E-W
2004	Sykes's	Bridge	40	W-E
2004	Sykes's	Bridge	30	W-E
2004	Sykes's	Bridge	30	W-E
2004	Sykes's	Bridge	30	W-E
2004	Sykes's	Bridge	30	W-E
2004	Sykes's	Bridge	30	W-E
2004	Sykes's	Bridge	43	E-W
2004	Sykes's	Bridge	43	E-W
2004	Sykes's	Bridge	35	E-W
2004	Sykes's	Bridge	35	E-W
2004	Sykes's	Bridge	33	E-W
2004	Sykes's	Bridge	33	E-W
2004	Sykes's	Bridge	35	W-E
2004	Sykes's	Bridge	35	W-E
2004	Sykes's	Bridge	35	W-E
2004	Sykes's	Bridge	36	W-E
2004	Sykes's	Bridge	36	W-E
2004	Sykes's	Bridge	36	W-E
2004	Sykes's	Bridge	41	E-W
2004	Sykes's	Bridge	34	W-E
2004	Sykes's	Bridge	41	W-E
2004	Sykes's	Bridge	41	W-E
2004	Sykes's	Bridge	34	W-E
2004	Sykes's	Bridge	37	W-E
2004	Sykes's	Bridge	37	E-W
2004	Sykes's	Bridge	32	W-E
2004	Sykes's	Bridge	32	W-E
2004	Sykes's	Bridge	36	W-E
2004	Sykes's	Bridge	36	W-E
2004	Sykes's	Bridge	44	W-E
2004	Sykes's	Bridge	47	W-E
2004	Sykes's	Bridge	69	W-E
2004	Sykes's	Bridge	43	E-W
2004	Sykes's	Bridge	43	E-W
2004	Sykes's	Bridge	43	E-W
2004	Sykes's	Bridge	43	E-W
2004	Sykes's	Bridge	43	E-W
2004	Sykes's	Bridge	25	W-E
2004	Sykes's	Bridge	54	E-W
2004	Sykes's	Bridge	54	E-W
2004	Sykes's	Bridge	54	E-W
2004	Sykes's	Bridge	44	W-E
2004	Sykes's	Bridge	46	W-E
2004	Sykes's	Bridge	46	W-E
2004	Sykes's	Bridge	47	W-E
2004	Sykes's	Bridge	47	W-E
2004	Sykes's	Bridge	45	E-W
2004	Sykes's	Bridge	45	E-W
2004	Sykes's	Bridge	46	W-E
2004	Sykes's	Bridge	46	W-E
2004	Sykes's	Bridge	46	W-E
2004	Sykes's	Bridge	46	W-E
2004	Sykes's	Bridge	29	W-E
2004	Sykes's	Bridge	45	E-W
2004	Sykes's	Bridge	52	E-W
2004	Sykes's	Bridge	52	E-W
2004	Sykes's	Bridge	26	W-E
2004	Sykes's	Bridge	26	W-E
2004	Sykes's	Bridge	26	W-E
2004	Sykes's	Bridge	26	W-E
2004	Sykes's	Bridge	26	W-E
2004	Sykes's	Bridge	26	W-E
2004	Sykes's	Bridge	34	W-E
2004	Sykes's	Bridge	45	W-E
2004	Sykes's	Bridge	27	W-E
2004	Sykes's	Bridge	33	W-E
2004	Sykes's	Bridge	37	E-W
2004	Sykes's	Bridge	37	E-W
2004	Sykes's	Bridge	37	E-W
2004	Sykes's	Bridge	37	E-W
2004	Sykes's	Bridge	37	E-W
2004	Sykes's	Bridge	45	W-E
2004	Sykes's	Bridge	45	W-E
2004	Sykes's	Bridge	19	E-W
2004	Sykes's	Bridge	55	W-E
2004	Sykes's	Bridge	55	W-E
2004	Sykes's	Bridge	55	W-E
2004	Sykes's	Bridge	55	W-E
2004	Sykes's	Bridge	55	W-E
2004	Sykes's	Bridge	55	W-E
2004	Sykes's	Bridge	55	W-E
2004	Sykes's	Bridge	55	W-E
2004	Sykes's	Bridge	47	W-E
2004	Sykes's	Bridge	44	W-E
2004	Sykes's	Bridge	40	W-E
2004	Sykes's	Bridge	40	E-W
2004	Sykes's	Bridge	40	E-W
2004	Sykes's	Bridge	40	E-W
2004	Sykes's	Bridge	40	E-W
2004	Sykes's	Bridge	40	E-W
2004	Sykes's	Bridge	40	E-W
2004	Sykes's	Bridge	40	E-W
2004	Sykes's	Bridge	40	E-W
2004	Sykes's	Bridge	40	E-W
2004	Sykes's	Bridge	40	E-W
2004	Sykes's	Bridge	40	E-W
2004	Sykes's	Bridge	40	E-W
2004	Sykes's	Bridge	19	W-E
2004	Sykes's	Bridge	19	E-W
2004	Sykes's	Bridge	75	W-E
2004	Sykes's	Bridge	46	W-E
2004	Sykes's	Bridge	48	W-E
2004	Sykes's	Bridge	48	E-W
2004	Sykes's	Bridge	36	W-E
2004	Sykes's	Bridge	27	E-W
2004	Sykes's	Bridge	44	W-E
2004	Sykes's	Bridge	44	E-W
2004	Sykes's	Bridge	59	W-E
2004	Sykes's	Bridge	44	W-E
2004	Sykes's	Bridge	53	W-E
2004	Sykes's	Bridge	53	W-E
2004	Sykes's	Bridge	53	W-E
2004	Sykes's	Bridge	53	W-E
2004	Sykes's	Bridge	53	W-E
2004	Sykes's	Bridge	53	W-E
2004	Sykes's	Bridge	53	W-E
2004	Sykes's	Bridge	53	W-E
2004	Sykes's	Bridge	53	W-E
2004	Sykes's	Bridge	53	W-E
2004	Sykes's	Bridge	30	W-E
2004	Sykes's	Bridge	48	W-E
2004	Sykes's	Bridge	47	W-E
2004	Sykes's	Bridge	51	W-E
2004	Sykes's	Bridge	51	W-E
2004	Sykes's	Bridge	51	W-E
2004	Sykes's	Bridge	51	W-E
2004	Sykes's	Bridge	51	W-E
2004	Sykes's	Bridge	51	W-E
2004	Sykes's	Bridge	51	W-E
2004	Sykes's	Bridge	51	W-E
2004	Sykes's	Bridge	51	W-E
2004	Sykes's	Bridge	51	W-E
2004	Sykes's	Bridge	51	W-E
2004	Sykes's	Bridge	51	W-E
2004	Sykes's	Bridge	51	W-E
2004	Sykes's	Bridge	51	W-E
2004	Sykes's	Bridge	51	W-E
2004	Sykes's	Bridge	40	W-E
2004	Sykes's	Bridge	40	W-E
2004	Sykes's	Bridge	40	E-W
2004	Sykes's	Bridge	40	E-W
2004	Sykes's	Bridge	40	E-W
2004	Sykes's	Bridge	40	E-W
2004	Sykes's	Bridge	40	E-W
2004	Sykes's	Bridge	47	E-W
2004	Sykes's	Bridge	47	E-W
2004	Sykes's	Bridge	47	E-W
2004	Sykes's	Bridge	47	E-W
2004	Sykes's	Bridge	65	E-W
2004	Sykes's	Bridge	39	W-E
2004	Sykes's	Bridge	39	E-W
2004	Sykes's	Bridge	39	E-W
2004	Sykes's	Bridge	36	E-W
2004	Sykes's	Bridge	68	E-W
2004	Sykes's	Bridge	61	W-E
2004	Sykes's	Bridge	50	E-W
2004	Sykes's	Bridge	50	E-W
2004	Sykes's	Bridge	50	E-W
2004	Sykes's	Bridge	57	W-E
2004	Sykes's	Bridge	57	E-W
2004	Sykes's	Bridge	48	E-W
2004	Sykes's	Bridge	50	W-E
2004	Sykes's	Bridge	62	E-W
2004	Sykes's	Bridge	68	W-E
2004	Sykes's	Bridge	68	E-W
2004	Sykes's	Bridge	37	W-E
2004	Sykes's	Bridge	37	W-E
2004	Sykes's	Bridge	37	W-E
2004	Sykes's	Bridge	30	E-W
2004	Sykes's	Bridge	46	W-E
2004	Sykes's	Bridge	47	E-W
2004	Sykes's	Bridge	47	E-W
2004	Sykes's	Bridge	34	W-E
2004	Sykes's	Bridge	34	W-E
2004	Sykes's	Bridge	34	E-W
2004	Sykes's	Bridge	65	E-W
2004	Sykes's	Bridge	65	W-E
2004	Sykes's	Bridge	68	W-E
2004	Sykes's	Bridge	35	E-W
2004	Sykes's	Bridge	35	E-W
2004	Sykes's	Bridge	35	E-W
2004	Sykes's	Bridge	22	W-E
2004	Sykes's	Bridge	22	E-W
2004	Sykes's	Bridge	27	E-W
2004	Sykes's	Bridge	50	W-E
2004	Sykes's	Bridge	53	E-W
2004	Sykes's	Bridge	30	W-E
2004	Sykes's	Bridge	30	W-E
2004	Sykes's	Bridge	30	W-E
2004	Sykes's	Bridge	28	W-E
2004	Sykes's	Bridge	45	W-E
2004	Sykes's	Bridge	65	W-E
2004	Sykes's	Bridge	30	W-E
2004	Sykes's	Bridge	30	W-E
2004	Sykes's	Bridge	30	W-E
2004	Sykes's	Bridge	48	E-W
2004	Sykes's	Bridge	65	W-E
2004	Sykes's	Bridge	65	W-E
2004	Sykes's	Bridge	65	W-E
2004	Sykes's	Bridge	65	W-E
2004	Sykes's	Bridge	65	W-E
2004	Sykes's	Bridge	65	W-E
2004	Sykes's	Bridge	65	W-E
2004	Sykes's	Bridge	65	W-E
2004	Sykes's	Bridge	65	W-E
2004	Sykes's	Bridge	54	W-E
2011	Sykes's	Bridge	9	W-E
2011	Sykes's	Bridge	20	W-E
2011	Sykes's	Bridge	20	E-W
2011	Sykes's	Bridge	8	W-E
2011	Sykes's	Bridge	8	W-E
2011	Sykes's	Bridge	8	W-E
2011	Sykes's	Bridge	8	W-E
2011	Sykes's	Bridge	8	E-W
2011	Sykes's	Bridge	8	E-W
2011	Sykes's	Bridge	8	E-W
2011	Sykes's	Bridge	8	E-W
2011	Sykes's	Bridge	8	E-W
2011	Sykes's	Bridge	23	E-W
2011	Sykes's	Bridge	23	E-W
2011	Sykes's	Bridge	14	W-E
2011	Sykes's	Bridge	14	E-W
2011	Sykes's	Bridge	14	E-W
2011	Sykes's	Bridge	14	E-W
2011	Sykes's	Bridge	14	E-W
2011	Sykes's	Bridge	14	E-W
2011	Sykes's	Bridge	14	E-W
2011	Sykes's	Bridge	14	E-W
2011	Sykes's	Bridge	14	E-W
2011	Sykes's	Bridge	14	E-W
2011	Sykes's	Bridge	14	E-W
2011	Sykes's	Bridge	14	E-W
2011	Sykes's	Bridge	14	E-W
2011	Sykes's	Bridge	14	E-W
2011	Sykes's	Bridge	14	E-W
2011	Sykes's	Bridge	11	W-E
2011	Sykes's	Bridge	12	E-W
2011	Sykes's	Bridge	12	E-W
2011	Sykes's	Bridge	12	E-W
2011	Sykes's	Bridge	12	E-W
2011	Sykes's	Bridge	12	E-W
2011	Sykes's	Bridge	12	E-W
2011	Sykes's	Bridge	41	W-E
2011	Sykes's	Bridge	41	W-E
2011	Sykes's	Bridge	41	W-E
2011	Sykes's	Bridge	8	W-E
2011	Sykes's	Bridge	14	W-E
2011	Sykes's	Bridge	14	W-E
2011	Sykes's	Bridge	20	E-W
2011	Sykes's	Bridge	20	E-W
2011	Sykes's	Bridge	20	E-W
2011	Sykes's	Bridge	20	E-W
2011	Sykes's	Bridge	20	E-W
2011	Sykes's	Bridge	19	E-W
2011	Sykes's	Bridge	19	E-W
2011	Sykes's	Bridge	18	E-W
2011	Sykes's	Bridge	12	W-E
2011	Sykes's	Bridge	12	W-E
2011	Sykes's	Bridge	12	W-E
2011	Sykes's	Bridge	22	E-W
2011	Sykes's	Bridge	22	E-W
2011	Sykes's	Bridge	22	E-W
2011	Sykes's	Bridge	22	E-W
2011	Sykes's	Bridge	22	E-W
2011	Sykes's	Bridge	22	E-W
2011	Sykes's	Bridge	22	E-W
2011	Sykes's	Bridge	22	E-W
2011	Sykes's	Bridge	22	E-W
2011	Sykes's	Bridge	22	E-W
2011	Sykes's	Bridge	18	W-E
2011	Sykes's	Bridge	18	W-E
2011	Sykes's	Bridge	18	W-E
2011	Sykes's	Bridge	18	W-E
2011	Sykes's	Bridge	18	W-E
2011	Sykes's	Bridge	25	E-W
2011	Sykes's	Bridge	18	W-E
2011	Sykes's	Bridge	18	W-E
2011	Sykes's	Bridge	21	W-E
2011	Sykes's	Bridge	21	E-W
2011	Sykes's	Bridge	19	W-E
2011	Sykes's	Bridge	19	E-W
2011	Sykes's	Bridge	17	E-W
2011	Sykes's	Bridge	17	E-W
2011	Sykes's	Bridge	17	E-W
2011	Sykes's	Bridge	24	E-W
2011	Sykes's	Bridge	24	E-W
2011	Sykes's	Bridge	20	W-E
2011	Sykes's	Bridge	20	E-W
2011	Sykes's	Bridge	20	E-W
2011	Sykes's	Bridge	20	E-W
2011	Sykes's	Bridge	20	E-W
2011	Sykes's	Bridge	15	W-E
2011	Sykes's	Bridge	15	W-E
2011	Sykes's	Bridge	15	E-W
2011	Sykes's	Bridge	25	E-W
2011	Sykes's	Bridge	25	E-W
2011	Sykes's	Bridge	25	E-W
2011	Sykes's	Bridge	25	E-W
2011	Sykes's	Bridge	25	E-W
2011	Sykes's	Bridge	25	E-W
2011	Sykes's	Bridge	25	E-W
2011	Sykes's	Bridge	25	E-W
2011	Sykes's	Bridge	25	E-W
2011	Sykes's	Bridge	25	E-W
2011	Sykes's	Bridge	25	E-W
2011	Sykes's	Bridge	25	E-W
2011	Sykes's	Bridge	25	E-W
2011	Sykes's	Bridge	25	E-W
2011	Sykes's	Bridge	25	E-W
2011	Sykes's	Bridge	25	E-W
2011	Sykes's	Bridge	25	E-W
2011	Sykes's	Bridge	25	E-W
2011	Sykes's	Bridge	25	E-W
2011	Sykes's	Bridge	23	W-E
2011	Sykes's	Bridge	23	W-E
2011	Sykes's	Bridge	23	E-W
2011	Sykes's	Bridge	23	E-W
2011	Sykes's	Bridge	24	E-W
2011	Sykes's	Bridge	24	W-E
2011	Sykes's	Bridge	24	W-E
2011	Sykes's	Bridge	24	W-E
2011	Sykes's	Bridge	23	E-W
2011	Sykes's	Bridge	24	E-W
2011	Sykes's	Bridge	24	E-W
2011	Sykes's	Bridge	15	W-E
2011	Sykes's	Bridge	19	E-W
2011	Sykes's	Bridge	30	W-E
2011	Sykes's	Bridge	30	W-E
2011	Sykes's	Bridge	30	W-E
2011	Sykes's	Bridge	30	W-E
2011	Sykes's	Bridge	30	W-E
2011	Sykes's	Bridge	30	W-E
2011	Sykes's	Bridge	31	W-E
2011	Sykes's	Bridge	31	W-E
2011	Sykes's	Bridge	31	W-E
2011	Sykes's	Bridge	31	W-E
2011	Sykes's	Bridge	31	W-E
2011	Sykes's	Bridge	31	E-W
2011	Sykes's	Bridge	31	E-W
2011	Sykes's	Bridge	31	E-W
2011	Sykes's	Bridge	30	E-W
2011	Sykes's	Bridge	30	E-W
2011	Sykes's	Bridge	30	E-W
2011	Sykes's	Bridge	30	E-W
2011	Sykes's	Bridge	30	E-W
2011	Sykes's	Bridge	42	W-E
2011	Sykes's	Bridge	42	W-E
2011	Sykes's	Bridge	42	E-W
2011	Sykes's	Bridge	42	E-W
2011	Sykes's	Bridge	42	E-W
2011	Sykes's	Bridge	25	W-E
2011	Sykes's	Bridge	27	E-W
2011	Sykes's	Bridge	27	E-W
2011	Sykes's	Bridge	35	E-W
2011	Sykes's	Bridge	35	E-W
2011	Sykes's	Bridge	17	W-E
2011	Sykes's	Bridge	17	W-E
2011	Sykes's	Bridge	17	E-W
2011	Sykes's	Bridge	17	E-W
2011	Sykes's	Bridge	26	W-E
2011	Sykes's	Bridge	28	E-W
2011	Sykes's	Bridge	28	E-W
2011	Sykes's	Bridge	28	E-W
2011	Sykes's	Bridge	26	E-W
2011	Sykes's	Bridge	26	E-W
2011	Sykes's	Bridge	26	E-W
2011	Sykes's	Bridge	26	E-W
2011	Sykes's	Bridge	13	W-E
2011	Sykes's	Bridge	17	E-W
2011	Sykes's	Bridge	17	E-W
2011	Sykes's	Bridge	17	E-W
2011	Sykes's	Bridge	17	E-W
2011	Sykes's	Bridge	17	E-W
2011	Sykes's	Bridge	17	E-W
2011	Sykes's	Bridge	17	E-W
2011	Sykes's	Bridge	36	W-E
2011	Sykes's	Bridge	36	E-W
2011	Sykes's	Bridge	36	E-W
2011	Sykes's	Bridge	36	E-W
2011	Sykes's	Bridge	10	E-W
2011	Sykes's	Bridge	29	E-W
2011	Sykes's	Bridge	32	W-E
2011	Sykes's	Bridge	32	W-E
2011	Sykes's	Bridge	32	W-E
2011	Sykes's	Bridge	32	W-E
2011	Sykes's	Bridge	28	E-W
2011	Sykes's	Bridge	28	E-W
2011	Sykes's	Bridge	28	E-W
2011	Sykes's	Bridge	28	E-W
2011	Sykes's	Bridge	28	W-E
2011	Sykes's	Bridge	28	E-W
2011	Sykes's	Bridge	28	E-W
2011	Sykes's	Bridge	28	E-W
2011	Sykes's	Bridge	32	W-E
2011	Sykes's	Bridge	32	W-E
2011	Sykes's	Bridge	32	E-W
2011	Sykes's	Bridge	25	E-W
2011	Sykes's	Bridge	24	E-W
2011	Sykes's	Bridge	24	E-W
2011	Sykes's	Bridge	24	E-W
2011	Sykes's	Bridge	24	E-W
2011	Sykes's	Bridge	24	E-W
2011	Sykes's	Bridge	24	E-W
2011	Sykes's	Bridge	24	E-W
2011	Sykes's	Bridge	35	W-E
2011	Sykes's	Bridge	35	W-E
2011	Sykes's	Bridge	32	W-E
2011	Sykes's	Bridge	32	E-W
2011	Sykes's	Bridge	32	E-W
2011	Sykes's	Bridge	36	W-E
2011	Sykes's	Bridge	36	W-E
2011	Sykes's	Bridge	36	E-W
2011	Sykes's	Bridge	36	E-W
2011	Sykes's	Bridge	36	E-W
2011	Sykes's	Bridge	23	W-E
2011	Sykes's	Bridge	34	W-E
2011	Sykes's	Bridge	38	W-E
2011	Sykes's	Bridge	38	W-E
2011	Sykes's	Bridge	38	W-E
2011	Sykes's	Bridge	38	E-W
2011	Sykes's	Bridge	21	E-W
2011	Sykes's	Bridge	21	E-W
2011	Sykes's	Bridge	32	E-W
2011	Sykes's	Bridge	20	E-W
2011	Sykes's	Bridge	20	E-W
2011	Sykes's	Bridge	24	E-W
2011	Sykes's	Bridge	31	W-E
2011	Sykes's	Bridge	44	W-E
2011	Sykes's	Bridge	44	W-E
2011	Sykes's	Bridge	44	W-E
2011	Sykes's	Bridge	44	E-W
2011	Sykes's	Bridge	24	E-W
2011	Sykes's	Bridge	24	E-W
2011	Sykes's	Bridge	24	E-W
2011	Sykes's	Bridge	24	E-W
2011	Sykes's	Bridge	24	E-W
2011	Sykes's	Bridge	24	E-W
2011	Sykes's	Bridge	24	E-W
2011	Sykes's	Bridge	32	E-W
2011	Sykes's	Bridge	32	E-W
2011	Sykes's	Bridge	25	W-E
2011	Sykes's	Bridge	25	W-E
2011	Sykes's	Bridge	25	W-E
2011	Sykes's	Bridge	26	E-W
2011	Sykes's	Bridge	26	E-W
2011	Sykes's	Bridge	26	E-W
2011	Sykes's	Bridge	26	E-W
2011	Sykes's	Bridge	26	E-W
2011	Sykes's	Bridge	26	E-W
2011	Sykes's	Bridge	26	E-W
2011	Sykes's	Bridge	26	E-W
2011	Sykes's	Bridge	26	E-W
2011	Sykes's	Bridge	25	W-E
2011	Sykes's	Bridge	20	E-W
2011	Sykes's	Bridge	20	E-W
2011	Sykes's	Bridge	20	E-W
2011	Sykes's	Bridge	18	E-W
2011	Sykes's	Bridge	18	E-W
2011	Sykes's	Bridge	18	E-W
2011	Sykes's	Bridge	30	W-E
2011	Sykes's	Bridge	30	W-E
2011	Sykes's	Bridge	30	E-W
2011	Sykes's	Bridge	32	W-E
2011	Sykes's	Bridge	32	W-E
2011	Sykes's	Bridge	32	W-E
2011	Sykes's	Bridge	32	E-W
2011	Sykes's	Bridge	40	W-E
2011	Sykes's	Bridge	40	W-E
2011	Sykes's	Bridge	40	W-E
2011	Sykes's	Bridge	40	W-E
2011	Sykes's	Bridge	40	W-E
2011	Sykes's	Bridge	40	W-E
2011	Sykes's	Bridge	40	W-E
2011	Sykes's	Bridge	40	W-E
2011	Sykes's	Bridge	40	W-E
2011	Sykes's	Bridge	40	E-W
2011	Sykes's	Bridge	40	E-W
2011	Sykes's	Bridge	23	W-E
2011	Sykes's	Bridge	23	E-W
2011	Sykes's	Bridge	23	E-W
2011	Sykes's	Bridge	23	E-W
2011	Sykes's	Bridge	23	E-W
2011	Sykes's	Bridge	23	E-W
2011	Sykes's	Bridge	43	W-E
2011	Sykes's	Bridge	43	E-W
2011	Sykes's	Bridge	43	E-W
2011	Sykes's	Bridge	21	W-E
2011	Sykes's	Bridge	18	E-W
2011	Sykes's	Bridge	18	E-W
2011	Sykes's	Bridge	18	E-W
2011	Sykes's	Bridge	18	E-W
2011	Sykes's	Bridge	18	E-W
2011	Sykes's	Bridge	18	E-W
2011	Sykes's	Bridge	18	E-W
2011	Sykes's	Bridge	18	E-W
2011	Sykes's	Bridge	18	E-W
2011	Sykes's	Bridge	38	E-W
2011	Sykes's	Bridge	26	E-W
2011	Sykes's	Bridge	21	W-E
2011	Sykes's	Bridge	37	W-E
2011	Sykes's	Bridge	37	W-E
2011	Sykes's	Bridge	37	W-E
2011	Sykes's	Bridge	38	E-W
2011	Sykes's	Bridge	38	E-W
2011	Sykes's	Bridge	38	E-W
2011	Sykes's	Bridge	38	E-W
2011	Sykes's	Bridge	38	E-W
2011	Sykes's	Bridge	38	E-W
2011	Sykes's	Bridge	38	E-W
2011	Sykes's	Bridge	52	W-E
2011	Sykes's	Bridge	52	W-E
2011	Sykes's	Bridge	52	W-E
2011	Sykes's	Bridge	52	W-E
2011	Sykes's	Bridge	52	E-W
2011	Sykes's	Bridge	52	E-W
2011	Sykes's	Bridge	52	E-W
2011	Sykes's	Bridge	52	E-W
2011	Sykes's	Bridge	52	E-W
2011	Sykes's	Bridge	52	E-W
2011	Sykes's	Bridge	40	W-E
2011	Sykes's	Bridge	40	W-E
2011	Sykes's	Bridge	40	W-E
2011	Sykes's	Bridge	40	W-E
2011	Sykes's	Bridge	40	W-E
2011	Sykes's	Bridge	40	W-E
2011	Sykes's	Bridge	35	W-E
2011	Sykes's	Bridge	35	E-W
2011	Sykes's	Bridge	35	E-W
2011	Sykes's	Bridge	26	E-W
2011	Sykes's	Bridge	28	W-E
2011	Sykes's	Bridge	28	W-E
2011	Sykes's	Bridge	23	W-E
2011	Sykes's	Bridge	30	E-W
2011	Sykes's	Bridge	30	E-W
2011	Sykes's	Bridge	30	E-W
2011	Sykes's	Bridge	30	E-W
2011	Sykes's	Bridge	30	E-W
2011	Sykes's	Bridge	30	E-W
2011	Sykes's	Bridge	30	E-W
2011	Sykes's	Bridge	30	E-W
2011	Sykes's	Bridge	30	E-W
2011	Sykes's	Bridge	30	E-W
2011	Sykes's	Bridge	30	E-W
2011	Sykes's	Bridge	30	E-W
2011	Sykes's	Bridge	30	E-W
2011	Sykes's	Bridge	30	E-W
2011	Sykes's	Bridge	30	E-W
2011	Sykes's	Bridge	30	E-W
2011	Sykes's	Bridge	30	E-W
2011	Sykes's	Bridge	30	E-W
2011	Sykes's	Bridge	30	E-W
2011	Sykes's	Bridge	30	E-W
2011	Sykes's	Bridge	26	W-E
2011	Sykes's	Bridge	32	W-E
2011	Sykes's	Bridge	39	W-E
2011	Sykes's	Bridge	39	E-W
2011	Sykes's	Bridge	39	E-W
2011	Sykes's	Bridge	39	E-W
2011	Sykes's	Bridge	47	W-E
2011	Sykes's	Bridge	47	E-W
2011	Sykes's	Bridge	30	W-E
2011	Sykes's	Bridge	30	W-E
2011	Sykes's	Bridge	39	E-W
2011	Sykes's	Bridge	39	E-W
2011	Sykes's	Bridge	39	E-W
2011	Sykes's	Bridge	39	E-W
2011	Sykes's	Bridge	39	E-W
2011	Sykes's	Bridge	39	E-W
2011	Sykes's	Bridge	39	E-W
2011	Sykes's	Bridge	39	E-W
2011	Sykes's	Bridge	39	E-W
2011	Sykes's	Bridge	39	E-W
2011	Sykes's	Bridge	41	W-E
2011	Sykes's	Bridge	41	E-W
2011	Sykes's	Bridge	51	W-E
2011	Sykes's	Bridge	51	W-E
2011	Sykes's	Bridge	51	W-E
2011	Sykes's	Bridge	51	E-W
2011	Sykes's	Bridge	51	E-W
2011	Sykes's	Bridge	16	E-W
2011	Sykes's	Bridge	16	E-W
2011	Sykes's	Bridge	16	E-W
2011	Sykes's	Bridge	16	E-W
2011	Sykes's	Bridge	16	E-W
2011	Sykes's	Bridge	16	E-W
2011	Sykes's	Bridge	40	W-E
2011	Sykes's	Bridge	40	E-W
2011	Sykes's	Bridge	40	E-W
2011	Sykes's	Bridge	58	W-E
2011	Sykes's	Bridge	33	E-W
2011	Sykes's	Bridge	33	E-W
2011	Sykes's	Bridge	25	W-E
2011	Sykes's	Bridge	31	E-W
2011	Sykes's	Bridge	31	E-W
2011	Sykes's	Bridge	31	E-W
2011	Sykes's	Bridge	31	E-W
2011	Sykes's	Bridge	35	W-E
2011	Sykes's	Bridge	35	E-W
2011	Sykes's	Bridge	37	W-E
2011	Sykes's	Bridge	37	E-W
2011	Sykes's	Bridge	58	E-W
2011	Sykes's	Bridge	47	E-W
2011	Sykes's	Bridge	60	W-E
2011	Sykes's	Bridge	29	E-W
2011	Sykes's	Bridge	29	E-W
2011	Sykes's	Bridge	65	W-E
2011	Sykes's	Bridge	65	E-W
2011	Sykes's	Bridge	65	E-W
2011	Sykes's	Bridge	50	E-W
2011	Sykes's	Bridge	50	E-W
2011	Sykes's	Bridge	50	E-W
2011	Sykes's	Bridge	38	E-W
2011	Sykes's	Bridge	38	E-W
2011	Sykes's	Bridge	51	E-W
2011	Sykes's	Bridge	51	E-W
2011	Sykes's	Bridge	23	W-E
2011	Sykes's	Bridge	64	E-W
2011	Sykes's	Bridge	41	E-W
2011	Sykes's	Bridge	35	E-W
2011	Sykes's	Bridge	35	E-W
2011	Sykes's	Bridge	35	E-W
2011	Sykes's	Bridge	40	E-W
2011	Sykes's	Bridge	49	E-W
2011	Sykes's	Bridge	49	E-W
2011	Sykes's	Bridge	49	E-W
2011	Sykes's	Bridge	49	E-W
2011	Sykes's	Bridge	49	E-W
2011	Sykes's	Bridge	49	E-W
2011	Sykes's	Bridge	49	E-W
2011	Sykes's	Bridge	49	E-W
2011	Sykes's	Bridge	49	E-W
2011	Sykes's	Bridge	49	E-W
2011	Sykes's	Bridge	49	E-W
2011	Sykes's	Bridge	49	E-W
2011	Sykes's	Bridge	58	E-W
2011	Sykes's	Bridge	58	E-W
2011	Sykes's	Bridge	58	E-W
2011	Sykes's	Bridge	58	E-W
2011	Sykes's	Bridge	76	W-E
2011	Sykes's	Bridge	76	W-E
2011	Sykes's	Bridge	44	E-W
2011	Sykes's	Bridge	44	E-W
2011	Sykes's	Bridge	44	E-W
2011	Sykes's	Bridge	44	E-W
2011	Sykes's	Bridge	44	E-W
2011	Sykes's	Bridge	44	E-W
2011	Sykes's	Bridge	24	E-W
2011	Sykes's	Bridge	24	E-W
2011	Sykes's	Bridge	25	W-E
2011	Sykes's	Bridge	25	W-E
2011	Sykes's	Bridge	39	E-W
2011	Sykes's	Bridge	50	W-E
2011	Sykes's	Bridge	67	W-E
2011	Sykes's	Bridge	67	W-E
2011	Sykes's	Bridge	67	W-E
2011	Sykes's	Bridge	67	W-E
2011	Sykes's	Bridge	67	W-E
2011	Sykes's	Bridge	67	W-E
2011	Sykes's	Bridge	67	W-E
2011	Sykes's	Bridge	67	W-E
2011	Sykes's	Bridge	67	W-E
2011	Sykes's	Bridge	67	W-E
2011	Sykes's	Bridge	67	W-E
2011	Sykes's	Bridge	67	W-E
2011	Sykes's	Bridge	67	E-W
2011	Sykes's	Bridge	67	E-W
2011	Sykes's	Bridge	63	E-W
2011	Sykes's	Bridge	63	E-W
2011	Sykes's	Bridge	47	W-E
2011	Sykes's	Bridge	47	W-E
2011	Sykes's	Bridge	47	E-W
2011	Sykes's	Bridge	34	E-W
2011	Sykes's	Bridge	27	W-E
2011	Sykes's	Bridge	27	W-E
2011	Sykes's	Bridge	27	E-W
2011	Sykes's	Bridge	27	E-W
2011	Sykes's	Bridge	27	E-W
2011	Sykes's	Bridge	51	E-W
2011	Sykes's	Bridge	42	W-E
2011	Sykes's	Bridge	42	W-E
2011	Sykes's	Bridge	42	W-E
2011	Sykes's	Bridge	42	W-E
2011	Sykes's	Bridge	42	W-E
2011	Sykes's	Bridge	42	W-E
2011	Sykes's	Bridge	42	W-E
2011	Sykes's	Bridge	42	W-E
2011	Sykes's	Bridge	42	W-E
2011	Sykes's	Bridge	42	W-E
2011	Sykes's	Bridge	42	W-E
2011	Sykes's	Bridge	42	W-E
2011	Sykes's	Bridge	42	E-W
2011	Sykes's	Bridge	80	E-W
2011	Sykes's	Bridge	80	E-W
2011	Sykes's	Bridge	39	E-W
2011	Sykes's	Bridge	58	W-E
2011	Sykes's	Bridge	58	W-E
2011	Sykes's	Bridge	58	W-E
2011	Sykes's	Bridge	58	E-W
2011	Sykes's	Bridge	58	E-W
2011	Sykes's	Bridge	46	W-E
2011	Sykes's	Bridge	43	E-W
2011	Sykes's	Bridge	57	W-E
2011	Sykes's	Bridge	57	W-E
2011	Sykes's	Bridge	57	W-E
2011	Sykes's	Bridge	57	W-E
2011	Sykes's	Bridge	57	W-E
2011	Sykes's	Bridge	57	W-E
2011	Sykes's	Bridge	57	W-E
2011	Sykes's	Bridge	57	W-E
2011	Sykes's	Bridge	57	W-E
2011	Sykes's	Bridge	57	W-E
2011	Sykes's	Bridge	80	E-W
2011	Sykes's	Bridge	80	E-W
2011	Sykes's	Bridge	80	E-W
2011	Sykes's	Bridge	80	E-W
2011	Sykes's	Bridge	80	E-W
2011	Sykes's	Bridge	80	E-W
2011	Sykes's	Bridge	50	E-W
2011	Sykes's	Bridge	32	E-W
2011	Sykes's	Bridge	46	E-W
2011	Sykes's	Bridge	46	E-W
2011	Sykes's	Bridge	46	E-W
2011	Sykes's	Bridge	61	W-E
2011	Sykes's	Bridge	61	E-W
2011	Sykes's	Bridge	61	E-W
2011	Sykes's	Bridge	73	W-E
2011	Sykes's	Bridge	73	W-E
2011	Sykes's	Bridge	73	W-E
2011	Sykes's	Bridge	73	W-E
2011	Sykes's	Bridge	73	W-E
2011	Sykes's	Bridge	73	W-E
2011	Sykes's	Bridge	27	E-W
2011	Sykes's	Bridge	27	E-W
2011	Sykes's	Bridge	73	E-W
2011	Sykes's	Bridge	73	E-W
2011	Sykes's	Bridge	73	E-W
2011	Sykes's	Bridge	33	W-E
2011	Sykes's	Bridge	33	W-E
2011	Sykes's	Bridge	33	E-W
2011	Sykes's	Bridge	33	E-W
2011	Sykes's	Bridge	35	E-W
2011	Sykes's	Bridge	35	E-W
2011	Sykes's	Bridge	35	E-W
2011	Sykes's	Bridge	35	E-W
2011	Sykes's	Bridge	35	E-W
2011	Sykes's	Bridge	47	W-E
2011	Sykes's	Bridge	51	W-E
2011	Sykes's	Bridge	51	W-E
2011	Sykes's	Bridge	51	E-W
2011	Sykes's	Bridge	40	E-W
2011	Sykes's	Bridge	40	E-W
2011	Sykes's	Bridge	45	W-E
2011	Sykes's	Bridge	60	W-E
2011	Sykes's	Bridge	60	E-W
2011	Sykes's	Bridge	60	E-W
2011	Sykes's	Bridge	60	E-W
2011	Sykes's	Bridge	60	E-W
2011	Sykes's	Bridge	60	E-W
2011	Sykes's	Bridge	60	E-W
2011	Sykes's	Bridge	60	E-W
2011	Sykes's	Bridge	60	E-W
2011	Sykes's	Bridge	79	W-E
2011	Sykes's	Bridge	79	W-E
2011	Sykes's	Bridge	79	W-E
2011	Sykes's	Bridge	49	E-W
2011	Sykes's	Bridge	36	W-E
2011	Sykes's	Bridge	36	E-W
2011	Sykes's	Bridge	52	W-E
2011	Sykes's	Bridge	54	W-E
2011	Sykes's	Bridge	54	W-E
2011	Sykes's	Bridge	44	W-E
2011	Sykes's	Bridge	22	W-E
2011	Sykes's	Bridge	52	E-W
2011	Sykes's	Bridge	52	E-W
2011	Sykes's	Bridge	52	E-W
2011	Sykes's	Bridge	54	W-E
2011	Sykes's	Bridge	92	W-E
2011	Sykes's	Bridge	92	W-E
2011	Sykes's	Bridge	22	E-W
2011	Sykes's	Bridge	44	W-E
2011	Sykes's	Bridge	43	W-E
2011	Sykes's	Bridge	43	W-E
2011	Sykes's	Bridge	43	W-E
2011	Sykes's	Bridge	59	E-W
2011	Sykes's	Bridge	53	E-W
2011	Sykes's	Bridge	47	E-W
2011	Sykes's	Bridge	69	W-E
2011	Sykes's	Bridge	43	W-E
2011	Sykes's	Bridge	43	W-E
2011	Sykes's	Bridge	46	W-E
2011	Sykes's	Bridge	46	W-E
2011	Sykes's	Bridge	46	W-E
2011	Sykes's	Bridge	46	W-E
2011	Sykes's	Bridge	18	W-E
2011	Sykes's	Bridge	52	W-E
2011	Sykes's	Bridge	68	W-E
2011	Sykes's	Bridge	66	W-E
2011	Sykes's	Bridge	56	W-E
2011	Sykes's	Bridge	50	W-E
2011	Sykes's	Bridge	50	E-W
2011	Sykes's	Bridge	50	E-W
2011	Sykes's	Bridge	56	W-E
2011	Sykes's	Bridge	62	W-E
2011	Sykes's	Bridge	65	E-W
2011	Sykes's	Bridge	65	E-W
2011	Sykes's	Bridge	65	E-W
2011	Sykes's	Bridge	65	E-W
2011	Sykes's	Bridge	72	W-E
2011	Sykes's	Bridge	72	W-E
2011	Sykes's	Bridge	72	E-W
2011	Sykes's	Bridge	72	E-W
2011	Sykes's	Bridge	24	W-E
2011	Sykes's	Bridge	24	W-E
2011	Sykes's	Bridge	24	W-E
2011	Sykes's	Bridge	24	W-E
2011	Sykes's	Bridge	24	W-E
2011	Sykes's	Bridge	24	W-E
2011	Sykes's	Bridge	79	E-W
2011	Sykes's	Bridge	79	E-W
2011	Sykes's	Bridge	79	E-W
2011	Sykes's	Bridge	79	E-W
2011	Sykes's	Bridge	79	E-W
2011	Sykes's	Bridge	79	E-W
2011	Sykes's	Bridge	37	W-E
2011	Sykes's	Bridge	60	W-E
2011	Sykes's	Bridge	60	W-E
2011	Sykes's	Bridge	60	W-E
2011	Sykes's	Bridge	32	E-W
2011	Sykes's	Bridge	86	W-E
2011	Sykes's	Bridge	54	E-W
2011	Sykes's	Bridge	66	W-E
2011	Sykes's	Bridge	66	W-E
2011	Sykes's	Bridge	66	W-E
2011	Sykes's	Bridge	66	W-E
2011	Sykes's	Bridge	40	W-E
2011	Sykes's	Bridge	40	W-E
2011	Sykes's	Bridge	40	E-W
2011	Sykes's	Bridge	40	E-W
2011	Sykes's	Bridge	45	E-W
2011	Sykes's	Bridge	58	E-W
2011	Sykes's	Bridge	58	E-W
2011	Sykes's	Bridge	58	E-W
2011	Sykes's	Bridge	58	E-W
2011	Sykes's	Bridge	56	W-E
2011	Sykes's	Bridge	56	W-E
2011	Sykes's	Bridge	58	W-E
2011	Sykes's	Bridge	79	E-W
2011	Sykes's	Bridge	79	E-W
2011	Sykes's	Bridge	79	E-W
2011	Sykes's	Bridge	79	E-W
2011	Sykes's	Bridge	79	E-W
2011	Sykes's	Bridge	79	E-W
2011	Sykes's	Bridge	79	E-W
2011	Sykes's	Bridge	79	E-W
2011	Sykes's	Bridge	56	W-E
2011	Sykes's	Bridge	56	W-E
2011	Sykes's	Bridge	56	W-E
2011	Sykes's	Bridge	56	W-E
2011	Sykes's	Bridge	56	W-E
2011	Sykes's	Bridge	56	W-E
2011	Sykes's	Bridge	59	W-E
2011	Sykes's	Bridge	31	E-W
2011	Sykes's	Bridge	47	W-E
2011	Sykes's	Bridge	47	E-W
2011	Sykes's	Bridge	47	E-W
2011	Sykes's	Bridge	47	E-W
2011	Sykes's	Bridge	32	W-E
2011	Sykes's	Bridge	60	E-W
2011	Sykes's	Bridge	60	E-W
2011	Sykes's	Bridge	60	E-W
2011	Sykes's	Bridge	60	E-W
2011	Sykes's	Bridge	60	E-W
2011	Sykes's	Bridge	60	E-W
2011	Sykes's	Bridge	60	E-W
2011	Sykes's	Bridge	60	E-W
2011	Sykes's	Bridge	60	E-W
2011	Sykes's	Bridge	60	E-W
2011	Sykes's	Bridge	60	E-W
2011	Sykes's	Bridge	60	E-W
2011	Sykes's	Bridge	60	E-W
2011	Sykes's	Bridge	60	E-W
2011	Sykes's	Bridge	60	E-W
2011	Sykes's	Bridge	60	E-W
2011	Sykes's	Bridge	60	E-W
2011	Sykes's	Bridge	36	W-E
2011	Sykes's	Bridge	65	E-W
2011	Sykes's	Bridge	65	E-W
2011	Sykes's	Bridge	46	W-E
2011	Sykes's	Bridge	46	E-W
2011	Sykes's	Bridge	40	W-E
2011	Sykes's	Bridge	40	W-E
2011	Sykes's	Bridge	40	E-W
2011	Sykes's	Bridge	40	E-W
2011	Sykes's	Bridge	40	W-E
2011	Sykes's	Bridge	40	W-E
2011	Sykes's	Bridge	40	W-E
2011	Sykes's	Bridge	40	E-W
2011	Sykes's	Bridge	26	W-E
2011	Sykes's	Bridge	44	W-E
2011	Sykes's	Bridge	44	W-E
2011	Sykes's	Bridge	68	W-E
2011	Sykes's	Bridge	21	W-E
2011	Sykes's	Bridge	26	W-E
2011	Sykes's	Bridge	58	E-W
2011	Sykes's	Bridge	58	E-W
2011	Sykes's	Bridge	58	E-W
2011	Sykes's	Bridge	58	E-W
2011	Sykes's	Bridge	92	E-W
2011	Sykes's	Bridge	92	E-W
2011	Sykes's	Bridge	92	E-W
2011	Sykes's	Bridge	92	E-W
2011	Sykes's	Bridge	54	W-E
2011	Sykes's	Bridge	54	W-E
2011	Sykes's	Bridge	56	E-W
2011	Sykes's	Bridge	56	E-W
2011	Sykes's	Bridge	49	W-E
2011	Sykes's	Bridge	45	W-E
2011	Sykes's	Bridge	53	E-W
2011	Sykes's	Bridge	42	W-E
2011	Sykes's	Bridge	55	W-E
2011	Sykes's	Bridge	55	W-E
2011	Sykes's	Bridge	55	W-E
2011	Sykes's	Bridge	55	W-E
2011	Sykes's	Bridge	52	W-E
2011	Sykes's	Bridge	81	W-E
2011	Sykes's	Bridge	81	W-E
2011	Sykes's	Bridge	31	W-E
2011	Sykes's	Bridge	31	W-E
2011	Sykes's	Bridge	31	W-E
2011	Sykes's	Bridge	51	W-E
2011	Sykes's	Bridge	51	E-W
2011	Sykes's	Bridge	66	W-E
2011	Sykes's	Bridge	66	W-E
2011	Sykes's	Bridge	66	W-E
2011	Sykes's	Bridge	42	E-W
2011	Sykes's	Bridge	61	W-E
2011	Sykes's	Bridge	41	E-W
2011	Sykes's	Bridge	56	W-E
2011	Sykes's	Bridge	56	W-E
2011	Sykes's	Bridge	56	W-E
2011	Sykes's	Bridge	56	W-E
2011	Sykes's	Bridge	45	W-E
2011	Sykes's	Bridge	68	W-E
2011	Sykes's	Bridge	57	W-E
2011	Sykes's	Bridge	57	E-W
2011	Sykes's	Bridge	57	E-W
2011	Sykes's	Bridge	49	W-E
2011	Sykes's	Bridge	32	E-W
2011	Sykes's	Bridge	32	E-W
2011	Sykes's	Bridge	44	W-E
2011	Sykes's	Bridge	67	W-E
2011	Sykes's	Bridge	44	E-W
2011	Sykes's	Bridge	46	W-E
2011	Sykes's	Bridge	74	W-E
2011	Sykes's	Bridge	74	W-E
2011	Sykes's	Bridge	68	W-E
2011	Sykes's	Bridge	68	E-W
2011	Sykes's	Bridge	68	E-W
2011	Sykes's	Bridge	68	E-W
2011	Sykes's	Bridge	68	E-W
2011	Sykes's	Bridge	68	E-W
2011	Sykes's	Bridge	68	E-W
2011	Sykes's	Bridge	68	E-W
2011	Sykes's	Bridge	68	E-W
2011	Sykes's	Bridge	77	W-E
2011	Sykes's	Bridge	77	W-E
2011	Sykes's	Bridge	77	W-E
2011	Sykes's	Bridge	77	E-W
2011	Sykes's	Bridge	77	E-W
2011	Sykes's	Bridge	77	E-W
2011	Sykes's	Bridge	77	E-W
2011	Sykes's	Bridge	77	E-W
2011	Sykes's	Bridge	77	E-W
2011	Sykes's	Bridge	44	E-W
2011	Sykes's	Bridge	33	E-W
2011	Sykes's	Bridge	33	E-W
2011	Sykes's	Bridge	33	E-W
2011	Sykes's	Bridge	50	W-E
2011	Sykes's	Bridge	50	W-E
2011	Sykes's	Bridge	50	W-E
2011	Sykes's	Bridge	50	W-E
2011	Sykes's	Bridge	50	E-W
2011	Sykes's	Bridge	58	W-E
2011	Sykes's	Bridge	58	E-W
2011	Sykes's	Bridge	81	W-E
2011	Sykes's	Bridge	81	W-E
2011	Sykes's	Bridge	81	E-W
2011	Sykes's	Bridge	36	W-E
2011	Sykes's	Bridge	27	E-W
2011	Sykes's	Bridge	28	E-W
2011	Sykes's	Bridge	28	E-W
2011	Sykes's	Bridge	28	E-W
2011	Sykes's	Bridge	28	E-W
2011	Sykes's	Bridge	50	W-E
2011	Sykes's	Bridge	50	W-E
2011	Sykes's	Bridge	68	E-W
2011	Sykes's	Bridge	57	W-E
2011	Sykes's	Bridge	69	E-W
2011	Sykes's	Bridge	69	E-W
2011	Sykes's	Bridge	69	E-W
2011	Sykes's	Bridge	69	E-W
2011	Sykes's	Bridge	69	E-W
2011	Sykes's	Bridge	69	E-W
2011	Sykes's	Bridge	69	E-W
2011	Sykes's	Bridge	63	W-E
2011	Sykes's	Bridge	63	E-W
2011	Sykes's	Bridge	80	W-E
2011	Sykes's	Bridge	80	W-E
2011	Sykes's	Bridge	30	W-E
2011	Sykes's	Bridge	31	W-E
2011	Sykes's	Bridge	31	W-E
2011	Sykes's	Bridge	31	E-W
2011	Sykes's	Bridge	47	E-W
2011	Sykes's	Bridge	40	W-E
2011	Sykes's	Bridge	40	W-E
2011	Sykes's	Bridge	40	W-E
2011	Sykes's	Bridge	40	W-E
2011	Sykes's	Bridge	40	W-E
2011	Sykes's	Bridge	51	W-E
2011	Sykes's	Bridge	51	W-E
2011	Sykes's	Bridge	75	W-E
2011	Sykes's	Bridge	75	W-E
2011	Sykes's	Bridge	74	W-E
2011	Sykes's	Bridge	74	W-E
2011	Sykes's	Bridge	74	W-E
2011	Sykes's	Bridge	35	W-E
2011	Sykes's	Bridge	33	E-W
2011	Sykes's	Bridge	54	E-W
2011	Sykes's	Bridge	57	E-W
2011	Sykes's	Bridge	67	W-E
2011	Sykes's	Bridge	67	W-E
2011	Sykes's	Bridge	67	W-E
2011	Sykes's	Bridge	73	W-E
2011	Sykes's	Bridge	73	W-E
2011	Sykes's	Bridge	73	W-E
2011	Sykes's	Bridge	73	W-E
2011	Sykes's	Bridge	68	W-E
2011	Sykes's	Bridge	68	E-W
2011	Sykes's	Bridge	30	E-W
2011	Sykes's	Bridge	30	E-W
2011	Sykes's	Bridge	30	E-W
2011	Sykes's	Bridge	30	E-W
2011	Sykes's	Bridge	30	E-W
2011	Sykes's	Bridge	30	E-W
2011	Sykes's	Bridge	39	E-W
2011	Sykes's	Bridge	39	E-W
2011	Sykes's	Bridge	39	E-W
2011	Sykes's	Bridge	39	E-W
2011	Sykes's	Bridge	39	E-W
2011	Sykes's	Bridge	39	E-W
2011	Sykes's	Bridge	39	E-W
2011	Sykes's	Bridge	39	E-W
2011	Sykes's	Bridge	39	E-W
2011	Sykes's	Bridge	39	E-W
2011	Sykes's	Bridge	39	E-W
2011	Sykes's	Bridge	39	E-W
2011	Sykes's	Bridge	39	E-W
2011	Sykes's	Bridge	47	W-E
2011	Sykes's	Bridge	47	W-E
2011	Sykes's	Bridge	47	W-E
2011	Sykes's	Bridge	47	W-E
2011	Sykes's	Bridge	47	W-E
2011	Sykes's	Bridge	47	W-E
2011	Sykes's	Bridge	47	W-E
2011	Sykes's	Bridge	47	W-E
2011	Sykes's	Bridge	47	W-E
2011	Sykes's	Bridge	47	W-E
2011	Sykes's	Bridge	47	W-E
2011	Sykes's	Bridge	47	W-E
2011	Sykes's	Bridge	47	W-E
2011	Sykes's	Bridge	47	W-E
2011	Sykes's	Bridge	47	W-E
2011	Sykes's	Bridge	47	W-E
2011	Sykes's	Bridge	47	W-E
2011	Sykes's	Bridge	47	W-E
2011	Sykes's	Bridge	47	W-E
2011	Sykes's	Bridge	47	W-E
2011	Sykes's	Bridge	47	W-E
2011	Sykes's	Bridge	69	E-W
2011	Sykes's	Bridge	60	W-E
2011	Sykes's	Bridge	60	W-E
2011	Sykes's	Bridge	60	W-E
2011	Sykes's	Bridge	77	W-E
2011	Sykes's	Bridge	55	E-W
2011	Sykes's	Bridge	55	E-W
2011	Sykes's	Bridge	60	W-E
2011	Sykes's	Bridge	48	W-E
2011	Sykes's	Bridge	48	W-E
2011	Sykes's	Bridge	48	W-E
2011	Sykes's	Bridge	48	W-E
2011	Sykes's	Bridge	48	W-E
2011	Sykes's	Bridge	48	W-E
2011	Sykes's	Bridge	48	W-E
2011	Sykes's	Bridge	48	W-E
2011	Sykes's	Bridge	48	W-E
2011	Sykes's	Bridge	48	W-E
2011	Sykes's	Bridge	48	W-E
2011	Sykes's	Bridge	48	W-E
2011	Sykes's	Bridge	84	W-E
2011	Sykes's	Bridge	68	W-E
2011	Sykes's	Bridge	68	W-E
2011	Sykes's	Bridge	68	W-E
2011	Sykes's	Bridge	68	W-E
2011	Sykes's	Bridge	68	W-E
2011	Sykes's	Bridge	68	W-E
2011	Sykes's	Bridge	68	W-E
2011	Sykes's	Bridge	68	W-E
2011	Sykes's	Bridge	68	W-E
2011	Sykes's	Bridge	68	W-E
2011	Sykes's	Bridge	68	W-E
2011	Sykes's	Bridge	68	W-E
2011	Sykes's	Bridge	68	W-E
2011	Sykes's	Bridge	68	W-E
2011	Sykes's	Bridge	68	W-E
2011	Sykes's	Bridge	68	W-E
2011	Sykes's	Bridge	68	W-E
2011	Sykes's	Bridge	68	W-E
2011	Sykes's	Bridge	68	W-E
2011	Sykes's	Bridge	68	W-E
2011	Sykes's	Bridge	68	W-E
2011	Sykes's	Bridge	68	W-E
2011	Sykes's	Bridge	68	W-E
2011	Sykes's	Bridge	68	W-E
2011	Sykes's	Bridge	68	W-E
2011	Sykes's	Bridge	68	W-E
2011	Sykes's	Bridge	68	W-E
2011	Sykes's	Bridge	68	W-E
2011	Sykes's	Bridge	45	E-W
2011	Sykes's	Bridge	45	E-W
2011	Sykes's	Bridge	45	E-W
2011	Sykes's	Bridge	45	E-W
2011	Sykes's	Bridge	45	E-W
2011	Sykes's	Bridge	45	E-W
2011	Sykes's	Bridge	45	E-W
2011	Sykes's	Bridge	45	E-W
2011	Sykes's	Bridge	45	E-W
2011	Sykes's	Bridge	47	W-E
2011	Sykes's	Bridge	59	W-E
2011	Sykes's	Bridge	45	W-E
2011	Sykes's	Bridge	45	W-E
2011	Sykes's	Bridge	45	W-E
2011	Sykes's	Bridge	45	W-E
2011	Sykes's	Bridge	45	W-E
2011	Sykes's	Bridge	45	W-E
2011	Sykes's	Bridge	45	E-W
2011	Sykes's	Bridge	45	E-W
2011	Sykes's	Bridge	65	E-W
2011	Sykes's	Bridge	70	W-E
2011	Sykes's	Bridge	70	W-E
2011	Sykes's	Bridge	70	W-E
2011	Sykes's	Bridge	70	W-E
2011	Sykes's	Bridge	70	W-E
2011	Sykes's	Bridge	70	W-E
2011	Sykes's	Bridge	70	E-W
2011	Sykes's	Bridge	70	E-W
2011	Sykes's	Bridge	70	E-W
2011	Sykes's	Bridge	69	W-E
2011	Sykes's	Bridge	69	W-E
2011	Sykes's	Bridge	69	W-E
2011	Sykes's	Bridge	69	W-E
2011	Sykes's	Bridge	69	W-E
2011	Sykes's	Bridge	69	W-E
2011	Sykes's	Bridge	69	E-W
2011	Sykes's	Bridge	69	E-W
2011	Sykes's	Bridge	69	E-W
2011	Sykes's	Bridge	69	E-W
2011	Sykes's	Bridge	69	E-W
2011	Sykes's	Bridge	72	W-E
2011	Sykes's	Bridge	72	W-E
2011	Sykes's	Bridge	40	W-E
2011	Sykes's	Bridge	48	W-E
2011	Sykes's	Bridge	48	W-E
2011	Sykes's	Bridge	56	W-E
2011	Sykes's	Bridge	56	W-E
2011	Sykes's	Bridge	56	W-E
2011	Sykes's	Bridge	66	W-E
2011	Sykes's	Bridge	66	W-E
2011	Sykes's	Bridge	41	E-W
2011	Sykes's	Bridge	41	E-W
2011	Sykes's	Bridge	76	W-E
2011	Sykes's	Bridge	76	W-E
2011	Sykes's	Bridge	76	W-E
2011	Sykes's	Bridge	76	W-E
2011	Sykes's	Bridge	76	W-E
2011	Sykes's	Bridge	76	W-E
2011	Sykes's	Bridge	76	W-E
2011	Sykes's	Bridge	76	W-E
2011	Sykes's	Bridge	76	W-E
2011	Sykes's	Bridge	76	W-E
2011	Sykes's	Bridge	76	W-E
2011	Sykes's	Bridge	76	W-E
2011	Sykes's	Bridge	76	W-E
2011	Sykes's	Bridge	76	W-E
2011	Sykes's	Bridge	76	W-E
2011	Sykes's	Bridge	76	E-W
2011	Sykes's	Bridge	76	E-W
2011	Sykes's	Bridge	76	E-W
2011	Sykes's	Bridge	53	W-E
2011	Sykes's	Bridge	68	E-W
2011	Sykes's	Bridge	63	W-E
2011	Sykes's	Bridge	58	W-E
2011	Sykes's	Bridge	58	W-E
2011	Sykes's	Bridge	58	W-E
2011	Sykes's	Bridge	52	W-E
2011	Sykes's	Bridge	52	W-E
2011	Sykes's	Bridge	52	W-E
2011	Sykes's	Bridge	52	E-W
2011	Sykes's	Bridge	52	E-W
2011	Sykes's	Bridge	52	E-W
2011	Sykes's	Bridge	52	E-W
2011	Sykes's	Bridge	53	E-W
2011	Sykes's	Bridge	50	W-E
2011	Sykes's	Bridge	57	W-E
2011	Sykes's	Bridge	57	W-E
2011	Sykes's	Bridge	62	W-E
2011	Sykes's	Bridge	62	W-E
2011	Sykes's	Bridge	75	W-E
2011	Sykes's	Bridge	75	W-E
2011	Sykes's	Bridge	75	W-E
2011	Sykes's	Bridge	75	W-E
2011	Sykes's	Bridge	75	W-E
2011	Sykes's	Bridge	75	W-E
2011	Sykes's	Bridge	75	W-E
2011	Sykes's	Bridge	67	W-E
2011	Sykes's	Bridge	67	W-E
2011	Sykes's	Bridge	67	W-E
2011	Sykes's	Bridge	67	W-E
2011	Sykes's	Bridge	67	W-E
2011	Sykes's	Bridge	67	W-E
2011	Sykes's	Bridge	28	W-E
2011	Sykes's	Bridge	28	W-E
2011	Sykes's	Bridge	28	W-E
2011	Sykes's	Bridge	28	E-W
2011	Sykes's	Bridge	28	E-W
2011	Sykes's	Bridge	28	E-W
2011	Sykes's	Bridge	28	E-W
2011	Sykes's	Bridge	28	E-W
2011	Sykes's	Bridge	28	E-W
2011	Sykes's	Bridge	28	E-W
2011	Sykes's	Bridge	28	E-W
2011	Sykes's	Bridge	28	E-W
2011	Sykes's	Bridge	28	E-W
2011	Sykes's	Bridge	28	E-W
2011	Sykes's	Bridge	28	E-W
2011	Sykes's	Bridge	28	E-W
2011	Sykes's	Bridge	28	E-W
2011	Sykes's	Bridge	28	E-W
2011	Sykes's	Bridge	28	E-W
2011	Sykes's	Bridge	40	W-E
2011	Sykes's	Bridge	40	W-E
2011	Sykes's	Bridge	61	E-W
2011	Sykes's	Bridge	61	E-W
2011	Sykes's	Bridge	44	W-E
2011	Sykes's	Bridge	50	W-E
2011	Sykes's	Bridge	50	W-E
2011	Sykes's	Bridge	78	W-E
2011	Sykes's	Bridge	78	W-E
2011	Sykes's	Bridge	78	E-W
2011	Sykes's	Bridge	76	E-W
2011	Sykes's	Bridge	76	E-W
2011	Sykes's	Bridge	76	E-W
2011	Sykes's	Bridge	76	E-W
2011	Sykes's	Bridge	76	E-W
2011	Sykes's	Bridge	76	E-W
2011	Sykes's	Bridge	76	E-W
2011	Sykes's	Bridge	76	E-W
2011	Sykes's	Bridge	76	E-W
2011	Sykes's	Bridge	101	E-W
2011	Sykes's	Bridge	40	E-W
2011	Sykes's	Bridge	36	E-W
2011	Sykes's	Bridge	71	E-W
2011	Sykes's	Bridge	78	E-W
2011	Sykes's	Bridge	67	E-W
2011	Sykes's	Bridge	67	E-W
2011	Sykes's	Bridge	75	W-E
2011	Sykes's	Bridge	75	E-W
2011	Sykes's	Bridge	75	E-W
2011	Sykes's	Bridge	64	E-W
2011	Sykes's	Bridge	64	E-W
2011	Sykes's	Bridge	83	E-W
2011	Sykes's	Bridge	56	W-E
2011	Sykes's	Bridge	56	W-E
2011	Sykes's	Bridge	56	W-E
2011	Sykes's	Bridge	56	W-E
2011	Sykes's	Bridge	56	W-E
2011	Sykes's	Bridge	56	W-E
2011	Sykes's	Bridge	56	W-E
2011	Sykes's	Bridge	56	W-E
2011	Sykes's	Bridge	56	W-E
2011	Sykes's	Bridge	56	W-E
2011	Sykes's	Bridge	56	W-E
2011	Sykes's	Bridge	56	W-E
2011	Sykes's	Bridge	58	W-E
2011	Sykes's	Bridge	58	E-W
2011	Sykes's	Bridge	64	E-W
2011	Sykes's	Bridge	64	E-W
2011	Sykes's	Bridge	64	E-W
2011	Sykes's	Bridge	64	E-W
2011	Sykes's	Bridge	57	E-W
2011	Sykes's	Bridge	57	E-W
2011	Sykes's	Bridge	57	E-W
2011	Sykes's	Bridge	83	E-W
2011	Sykes's	Bridge	83	E-W
2011	Sykes's	Bridge	83	E-W
2011	Sykes's	Bridge	69	E-W
2011	Sykes's	Bridge	69	E-W
2011	Sykes's	Bridge	69	E-W
2011	Sykes's	Bridge	54	E-W
2011	Sykes's	Bridge	54	E-W
2011	Sykes's	Bridge	54	E-W
2011	Sykes's	Bridge	54	E-W
2011	Sykes's	Bridge	54	E-W
2011	Sykes's	Bridge	54	E-W
2011	Sykes's	Bridge	54	E-W
2011	Sykes's	Bridge	54	E-W
2011	Sykes's	Bridge	54	E-W
2011	Sykes's	Bridge	54	E-W
2011	Sykes's	Bridge	54	E-W
2011	Sykes's	Bridge	54	E-W
2011	Sykes's	Bridge	45	W-E
2011	Sykes's	Bridge	45	W-E
2011	Sykes's	Bridge	69	W-E
2011	Sykes's	Bridge	69	W-E
2011	Sykes's	Bridge	69	E-W
2011	Sykes's	Bridge	67	E-W
2011	Sykes's	Bridge	67	E-W
2011	Sykes's	Bridge	67	E-W
2011	Sykes's	Bridge	67	E-W
2011	Sykes's	Bridge	67	E-W
2011	Sykes's	Bridge	64	W-E
2011	Sykes's	Bridge	64	E-W
2011	Sykes's	Bridge	66	E-W
2011	Sykes's	Bridge	57	W-E
2011	Sykes's	Bridge	57	W-E
2011	Sykes's	Bridge	57	W-E
2011	Sykes's	Bridge	57	W-E
2011	Sykes's	Bridge	57	W-E
2011	Sykes's	Bridge	57	W-E
2011	Sykes's	Bridge	57	W-E
2011	Sykes's	Bridge	57	W-E
2011	Sykes's	Bridge	57	W-E
2011	Sykes's	Bridge	57	W-E
2011	Sykes's	Bridge	57	W-E
2011	Sykes's	Bridge	66	W-E
2011	Sykes's	Bridge	51	W-E
2011	Sykes's	Bridge	51	W-E
2011	Sykes's	Bridge	51	W-E
2011	Sykes's	Bridge	51	W-E
2011	Sykes's	Bridge	51	W-E
2011	Sykes's	Bridge	51	W-E
2011	Sykes's	Bridge	51	W-E
2011	Sykes's	Bridge	51	W-E
2011	Sykes's	Bridge	67	W-E
2011	Sykes's	Bridge	72	E-W
2011	Sykes's	Bridge	72	E-W
2011	Sykes's	Bridge	72	E-W
2011	Sykes's	Bridge	72	E-W
2011	Sykes's	Bridge	72	E-W
2011	Sykes's	Bridge	72	E-W
2011	Sykes's	Bridge	72	E-W
2011	Sykes's	Bridge	80	E-W
2011	Sykes's	Bridge	80	E-W
2011	Sykes's	Bridge	42	W-E
2011	Sykes's	Bridge	42	E-W
2011	Sykes's	Bridge	36	W-E
2011	Sykes's	Bridge	36	W-E
2011	Sykes's	Bridge	36	W-E
2011	Sykes's	Bridge	36	W-E
2011	Sykes's	Bridge	36	W-E
2011	Sykes's	Bridge	36	W-E
2011	Sykes's	Bridge	36	W-E
2011	Sykes's	Bridge	36	W-E
2011	Sykes's	Bridge	36	W-E
2011	Sykes's	Bridge	36	W-E
2011	Sykes's	Bridge	36	W-E
2011	Sykes's	Bridge	36	W-E
2011	Sykes's	Bridge	36	W-E
2011	Sykes's	Bridge	36	W-E
2011	Sykes's	Bridge	36	W-E
2011	Sykes's	Bridge	36	W-E
2011	Sykes's	Bridge	36	W-E
2011	Sykes's	Bridge	36	W-E
2011	Sykes's	Bridge	36	W-E
2011	Sykes's	Bridge	36	W-E
2011	Sykes's	Bridge	36	W-E
2011	Sykes's	Bridge	36	W-E
2011	Sykes's	Bridge	69	E-W
2011	Sykes's	Bridge	59	W-E
2011	Sykes's	Bridge	59	W-E
2011	Sykes's	Bridge	59	W-E
2011	Sykes's	Bridge	78	E-W
2011	Sykes's	Bridge	57	E-W
2011	Sykes's	Bridge	76	E-W
2011	Sykes's	Bridge	76	E-W
2011	Sykes's	Bridge	58	W-E
2011	Sykes's	Bridge	58	W-E
2011	Sykes's	Bridge	99	W-E
2011	Sykes's	Bridge	99	W-E
2011	Sykes's	Bridge	99	E-W
2011	Sykes's	Bridge	99	E-W
2011	Sykes's	Bridge	58	W-E
2011	Sykes's	Bridge	58	E-W
2011	Sykes's	Bridge	32	W-E
2011	Sykes's	Bridge	32	W-E
2011	Sykes's	Bridge	82	E-W
2011	Sykes's	Bridge	82	E-W
2011	Sykes's	Bridge	82	E-W
2011	Sykes's	Bridge	82	E-W
2011	Sykes's	Bridge	56	E-W
2011	Sykes's	Bridge	56	E-W
2011	Sykes's	Bridge	78	W-E
2011	Sykes's	Bridge	78	W-E
2011	Sykes's	Bridge	78	E-W
2011	Sykes's	Bridge	63	W-E
2011	Sykes's	Bridge	63	W-E
2011	Sykes's	Bridge	63	W-E
2011	Sykes's	Bridge	63	W-E
2011	Sykes's	Bridge	55	W-E
2011	Sykes's	Bridge	69	W-E
2011	Sykes's	Bridge	69	W-E
2011	Sykes's	Bridge	69	W-E
2011	Sykes's	Bridge	69	E-W
2011	Sykes's	Bridge	65	W-E
2011	Sykes's	Bridge	69	W-E
2011	Sykes's	Bridge	75	W-E
2011	Sykes's	Bridge	75	W-E
2011	Sykes's	Bridge	75	W-E
2011	Sykes's	Bridge	75	W-E
2011	Sykes's	Bridge	75	W-E
2011	Sykes's	Bridge	75	W-E
2011	Sykes's	Bridge	75	W-E
2011	Sykes's	Bridge	75	W-E
2011	Sykes's	Bridge	101	E-W
2011	Sykes's	Bridge	84	W-E
2011	Sykes's	Bridge	84	W-E
2011	Sykes's	Bridge	84	W-E
2011	Sykes's	Bridge	58	W-E
2011	Sykes's	Bridge	66	E-W
2011	Sykes's	Bridge	66	E-W
2011	Sykes's	Bridge	74	W-E
2011	Sykes's	Bridge	74	W-E
2011	Sykes's	Bridge	74	E-W
2011	Sykes's	Bridge	65	W-E
2011	Sykes's	Bridge	65	W-E
2011	Sykes's	Bridge	67	E-W
2011	Sykes's	Bridge	67	E-W
2011	Sykes's	Bridge	67	E-W
2011	Sykes's	Bridge	67	E-W
2011	Sykes's	Bridge	75	W-E
2011	Sykes's	Bridge	60	E-W
2011	Sykes's	Bridge	54	W-E
2011	Sykes's	Bridge	54	W-E
2011	Sykes's	Bridge	86	W-E
2011	Sykes's	Bridge	62	W-E
2011	Sykes's	Bridge	62	W-E
2011	Sykes's	Bridge	62	W-E
2011	Sykes's	Bridge	62	W-E
2011	Sykes's	Bridge	62	W-E
2011	Sykes's	Bridge	62	W-E
2011	Sykes's	Bridge	62	W-E
2011	Sykes's	Bridge	62	W-E
2011	Sykes's	Bridge	57	W-E
2011	Sykes's	Bridge	57	E-W
2011	Sykes's	Bridge	51	W-E
2011	Sykes's	Bridge	57	W-E
2011	Sykes's	Bridge	57	W-E
2011	Sykes's	Bridge	76	W-E
2011	Sykes's	Bridge	76	E-W
2011	Sykes's	Bridge	44	W-E
2011	Sykes's	Bridge	44	W-E
2020	Sykes's	Bridge	83	E-W
2020	Sykes's	Bridge	83	E-W
2020	Sykes's	Bridge	23	E-W
2020	Sykes's	Bridge	23	E-W
2020	Sykes's	Bridge	23	E-W
2020	Sykes's	Bridge	21	E-W
2020	Sykes's	Bridge	21	E-W
2020	Sykes's	Bridge	21	E-W
[truncated: 6,344 more rows]
