# Supplementary material
Source: publisher figshare collection journal article supplement (https://brill.figshare.com/articles/dataset/_/20058974)
Supplement: Supplementary file 1 [file 1]

# **Canopy bridges are an economical mitigation reducing the road barrier effect for three of four species of monkeys in Diani, Kenya**

Pamela M. K. Cunneyworth<sup>a,\*</sup>, Andrea Donaldson<sup>a,b,\*</sup> and Fredrick Onyancha<sup>a</sup>

<sup>a</sup>Colobus Conservation, PO Box 5380, Diani, 80401, Kenya

<sup>b</sup>Department of Anthropology, Durham University, Dawson Building, South Road, Durham,

DH1 3LE, UK

\*Corresponding author; e-mail: pam@colobusconservation.org; andrea.donaldson@durham.ac.uk

ORCID iD: Cunneyworth: 0000-0002-2338-7784

**Supplementary material**
